# Supplementary material
Source: PubMed Central journal article supplement (PMC3072108)
Supplement: NIHMS282273-supplement-01.pdf [file NIHMS282273-supplement-01.pdf]

Table S1  
NMR-based donor docking (HADDOCK)

|                                | UBC <sup>Ube2S</sup>                                          | donor ubiquitin                          |
|--------------------------------|---------------------------------------------------------------|------------------------------------------|
| <b>ambiguous restraints</b>    |                                                               |                                          |
| active residues                | 51, 52, 118, 121, 122, 124, 126                               | 8,42,46-49,68,70-72                      |
| passive residues               | 48,50,53,54,56,57,101,114,115,117,123,125,127,128,137,138,141 | 4,6,7,9-11,36-40,44,45,50,51,59,66,73,74 |
| <b>unambiguous restraint</b>   | 95 (S <sup>γ</sup> -atom)                                     | 76 (C-atom)                              |
| <b>fully flexible segments</b> | -                                                             | 70-76                                    |

|                         | # structures | RMSD (Å)    | E <sub>vdw</sub> (kcal mol <sup>-1</sup> ) | E <sub>elec</sub> (kcal mol <sup>-1</sup> ) | E <sub>AIR</sub> (kcal mol <sup>-1</sup> ) | buried surface area (Å <sup>2</sup> ) |
|-------------------------|--------------|-------------|--------------------------------------------|---------------------------------------------|--------------------------------------------|---------------------------------------|
| <b>cluster 1 (all)</b>  | 142          | 1.3 +/- 0.6 | -36 +/- 8                                  | -240 +/- 80                                 | 60 +/- 30                                  | 1300 +/- 100                          |
| cluster 1 (top 4)       |              | 0.8 +/- 0.5 | -42 +/- 5                                  | -380 +/- 50                                 | 50 +/- 20                                  | 1490 +/- 90                           |
| cluster 1 (no 1)        | 1            | 0           | -45.3                                      | -307.2                                      | 80.1                                       | 1367.9                                |
| cluster 1 (no 2)        | 1            | 1.2         | -44.5                                      | -393.7                                      | 37.7                                       | 1527.5                                |
| <b>cluster 1 (no 3)</b> | <b>1</b>     | <b>1.1</b>  | <b>-43.6</b>                               | <b>-414.3</b>                               | <b>33.6</b>                                | <b>1612.9</b>                         |
| cluster 1 (no 4)        | 1            | 0.7         | -33.6                                      | -419.4                                      | 52.3                                       | 1435.5                                |
| <b>cluster 2 (all)</b>  | 51           | 1.5 +/- 0.7 | -40 +/- 10                                 | -260 +/- 60                                 | 70 +/- 30                                  | 1600 +/- 200                          |
| cluster 2 (top 4)       |              | 0.8 +/- 0.5 | -60 +/- 10                                 | -350 +/- 40                                 | 50 +/- 20                                  | 1870 +/- 40                           |
| cluster 2 (no 1)        | 1            | 0           | -73.0                                      | -327.9                                      | 45.4                                       | 1924.5                                |
| cluster 2 (no 2)        | 1            | 0.9         | -41.5                                      | -397.3                                      | 79.1                                       | 1882.3                                |
| cluster 2 (no 3)        | 1            | 1.1         | -63.8                                      | -303.0                                      | 67.2                                       | 1802.2                                |
| cluster 2 (no 4)        | 1            | 1.2         | -54.4                                      | -371.9                                      | 17.0                                       | 1866.0                                |
| <b>cluster 3 (all)</b>  | 5            | 2 +/- 1     | -40 +/- 10                                 | -240 +/- 70                                 | 89 +/- 3                                   | 1300 +/- 100                          |
| cluster 3 (top 4)       |              | 2 +/- 1     | -40 +/- 10                                 | -270 +/- 40                                 | 89 +/- 3                                   | 1300 +/- 100                          |
| cluster 3 (no 1)        | 1            | 0           | -57.8                                      | -212.4                                      | 84.4                                       | 1494.0                                |
| cluster 3 (no 2)        | 1            | 1.1         | -41.7                                      | -313.6                                      | 93.4                                       | 1449.9                                |
| cluster 3 (no 3)        | 1            | 2.7         | -27.6                                      | -306.1                                      | 87.7                                       | 1225.9                                |
| cluster 3 (no 4)        | 1            | 2.6         | -25.4                                      | -249.2                                      | 90.7                                       | 1171.7                                |

E<sub>vdw</sub>: Van der Waals energy; E<sub>elec</sub>: electrostatic energy; E<sub>AIR</sub>: ambiguous interaction restraint violation energy;  
Output statistics for the selected model described in the text are highlighted in red

Table S2

Acceptor docking without experimental restraints (HADDOCK)

|                                | UBC <sup>Ube2S</sup> - donor ubiquitin complex                | acceptor ubiquitin        |
|--------------------------------|---------------------------------------------------------------|---------------------------|
| <b>ambiguous restraints</b>    |                                                               |                           |
| active residues                | 95 of Ube2S                                                   | 11                        |
| passive residues               | 89,93,96,97,99,100,128,129 of Ube2S; 75,76 of donor ubiquitin | 6-10,12,34                |
| <b>unambiguous restraint</b>   | 95 (S <sup>γ</sup> -atom)                                     | 11 (N <sup>ε</sup> -atom) |
| <b>fully flexible segments</b> | -                                                             | -                         |

|                        | # structures | RMSD (Å)    | E <sub>vdw</sub> (kcal mol <sup>-1</sup> ) | E <sub>elec</sub> (kcal mol <sup>-1</sup> ) | E <sub>AIR</sub> (kcal mol <sup>-1</sup> ) | buried surface area (Å <sup>2</sup> ) |
|------------------------|--------------|-------------|--------------------------------------------|---------------------------------------------|--------------------------------------------|---------------------------------------|
| <b>cluster 1 (all)</b> | 107          | 1.9 +/- 0.5 | -21 +/- 7                                  | -190 +/- 60                                 | 0.3 +/- 0.3                                | 800 +/- 200                           |
| cluster 1 (top 4)      |              | 1.2 +/- 0.8 | -29 +/- 8                                  | -320 +/- 40                                 | 0.3 +/- 0.2                                | 1100 +/- 100                          |
| cluster 1 (no 1)       | 1            | 0           | -36.1                                      | -330.4                                      | 0.1                                        | 1175.0                                |
| cluster 1 (no 2)       | 1            | 0.9         | -37.5                                      | -265.3                                      | 0.2                                        | 1202.1                                |
| cluster 1 (no 3)       | 1            | 1.8         | -22.9                                      | -302.8                                      | 0.6                                        | 1056.3                                |
| cluster 1 (no 4)       | 1            | 2.1         | -18.5                                      | -362.6                                      | 0.2                                        | 964.4                                 |
| <b>cluster 2 (all)</b> | 87           | 2.1 +/- 0.8 | -17 +/- 7                                  | -150 +/- 60                                 | 2 +/- 3                                    | 700 +/- 200                           |
| cluster 2 (top 4)      |              | 2 +/- 1     | -25 +/- 2                                  | -260 +/- 50                                 | 2 +/- 2                                    | 960 +/- 90                            |
| cluster 2 (no 1)       | 1            | 0           | -26.3                                      | -330.3                                      | 4.4                                        | 1060.1                                |
| cluster 2 (no 2)       | 1            | 3.7         | -21.8                                      | -245.0                                      | 0.2                                        | 824.3                                 |
| cluster 2 (no 3)       | 1            | 0.9         | -26.7                                      | -281.0                                      | 3.4                                        | 995.8                                 |
| cluster 2 (no 4)       | 1            | 1.8         | -26.6                                      | -180.8                                      | 0.1                                        | 945.5                                 |

Acceptor docking with experimental restraints (HADDOCK)

|                                | UBC <sup>Ube2S</sup> - donor ubiquitin complex                | acceptor ubiquitin                |
|--------------------------------|---------------------------------------------------------------|-----------------------------------|
| <b>ambiguous restraints</b>    |                                                               |                                   |
| active residues                | 95 of Ube2S                                                   | 6,11,12,34                        |
| passive residues               | 89,93,96,97,99,100,128,129 of Ube2S; 75,76 of donor ubiquitin | 4,7-10,14,29,31-33,35,36,66,68,70 |
| <b>unambiguous restraint</b>   | 95 (S <sup>γ</sup> -atom)                                     | 11 (N <sup>ε</sup> -atom)         |
| <b>fully flexible segments</b> | -                                                             | -                                 |

|                         | # structures | RMSD (Å)    | E <sub>vdw</sub> (kcal mol <sup>-1</sup> ) | E <sub>elec</sub> (kcal mol <sup>-1</sup> ) | E <sub>AIR</sub> (kcal mol <sup>-1</sup> ) | buried surface area (Å <sup>2</sup> ) |
|-------------------------|--------------|-------------|--------------------------------------------|---------------------------------------------|--------------------------------------------|---------------------------------------|
| <b>cluster 1 (all)</b>  | 198          | 1.6 +/- 0.5 | -20 +/- 5                                  | -160 +/- 30                                 | 1 +/- 4                                    | 800 +/- 100                           |
| cluster 1 (top 4)       |              | 1 +/- 0.6   | -24 +/- 2                                  | -200 +/- 50                                 | 0.3 +/- 0.3                                | 910 +/- 30                            |
| <b>cluster 1 (no 1)</b> | <b>1</b>     | <b>0</b>    | <b>-20.8</b>                               | <b>-273.2</b>                               | <b>0.2</b>                                 | <b>960.4</b>                          |
| cluster 1 (no 2)        | 1            | 1.2         | -23.6                                      | -197.6                                      | 0.1                                        | 874.6                                 |
| cluster 1 (no 3)        | 1            | 1.3         | -25.4                                      | -186.8                                      | 0.1                                        | 927.9                                 |
| cluster 1 (no 4)        | 1            | 1.4         | -24.2                                      | -149.2                                      | 0.7                                        | 896.2                                 |

Output statistics for the selected model described in the text are highlighted in red

Table S3

## Comparative acceptor docking analysis (HADDOCK)

|     |          | # structures | RMSD (Å)    | $E_{vdw}$ (kcal mol <sup>-1</sup> ) | $E_{elec}$ (kcal mol <sup>-1</sup> ) | $E_{AIR}$ (kcal mol <sup>-1</sup> ) | buried surface area (Å <sup>2</sup> ) |
|-----|----------|--------------|-------------|-------------------------------------|--------------------------------------|-------------------------------------|---------------------------------------|
| K6  | cluster1 | 113          | 1.9 +/- 0.8 | -20 +/- 10                          | -160 +/- 60                          | 1 +/- 3                             | 900 +/- 200                           |
|     | cluster2 | 36           | 1.8 +/- 0.6 | -15 +/- 6                           | -110 +/- 40                          | 2 +/- 9                             | 600 +/- 200                           |
|     | cluster3 | 36           | 2.3 +/- 0.9 | -16 +/- 6                           | -130 +/- 40                          | 0.2 +/- 0.2                         | 700 +/- 200                           |
|     | cluster4 | 5            | 2 +/- 1     | -11 +/- 5                           | -110 +/- 40                          | 0.3 +/- 0.2                         | 600 +/- 200                           |
|     | cluster5 | 5            | 2 +/- 1     | -12 +/- 9                           | -100 +/- 40                          | 0.4 +/- 0.2                         | 600 +/- 300                           |
| K11 | cluster1 | 107          | 1.9 +/- 0.5 | -21 +/- 7                           | -190 +/- 60                          | 0.3 +/- 0.3                         | 800 +/- 200                           |
|     | cluster2 | 87           | 2.1 +/- 0.8 | -17 +/- 7                           | -150 +/- 60                          | 2 +/- 3                             | 700 +/- 200                           |
| K27 | cluster1 | 145          | 1.6 +/- 0.6 | -30 +/- 10                          | -270 +/- 50                          | 20.0 +/- 20                         | 1200 +/- 200                          |
|     | cluster2 | 24           | 2 +/- 0.7   | -23 +/- 7                           | -290 +/- 90                          | 10.0 +/- 20                         | 1100 +/- 200                          |
|     | cluster3 | 11           | 1.2 +/- 0.4 | -36 +/- 9                           | -350 +/- 60                          | 1.0 +/- 0.7                         | 1500 +/- 200                          |
|     | cluster4 | 7            | 1 +/- 0.5   | -34 +/- 7                           | -260 +/- 30                          | 41 +/- 2                            | 1300 +/- 100                          |
|     | cluster5 | 4            | 1.3 +/- 0.8 | -21 +/- 9                           | -200 +/- 100                         | 44 +/- 4                            | 900 +/- 200                           |
| K29 | cluster1 | 189          | 2 +/- 0.8   | -17 +/- 7                           | -240 +/- 70                          | 0.5 +/- 0.5                         | 800 +/- 200                           |
|     | cluster2 | 7            | 1.6 +/- 0.8 | -19 +/- 6                           | -200 +/- 100                         | 0.4 +/- 0.5                         | 800 +/- 200                           |
| K33 | cluster1 | 145          | 2 +/- 1     | -13 +/- 7                           | -230 +/- 70                          | 0.2 +/- 0.3                         | 800 +/- 200                           |
|     | cluster2 | 48           | 1.3 +/- 0.4 | -12 +/- 7                           | -190 +/- 80                          | 0.2 +/- 0.2                         | 700 +/- 200                           |
|     | cluster3 | 5            | 1.2 +/- 0.6 | -11 +/- 4                           | -240 +/- 50                          | 0.3 +/- 0.5                         | 600 +/- 100                           |
| K48 | cluster1 | 105          | 1.9 +/- 0.6 | -16 +/- 5                           | -130 +/- 50                          | 0.2 +/- 0.2                         | 700 +/- 100                           |
|     | cluster2 | 42           | 3 +/- 1     | -19 +/- 7                           | -160 +/- 50                          | 0.2 +/- 0.1                         | 800 +/- 200                           |
|     | cluster3 | 19           | 1.9 +/- 0.7 | -10 +/- 4                           | -200 +/- 80                          | 0.2 +/- 0.1                         | 700 +/- 200                           |
|     | cluster4 | 18           | 1.7 +/- 0.6 | -21 +/- 6                           | -180 +/- 50                          | 0.2 +/- 0.2                         | 800 +/- 100                           |
|     | cluster5 | 10           | 3 +/- 2     | -14 +/- 6                           | -100 +/- 40                          | 0.2 +/- 0.1                         | 600 +/- 200                           |
|     | cluster6 | 4            | 1.1 +/- 0.7 | -20 +/- 5                           | -100 +/- 40                          | 0.1 +/- 0.1                         | 600 +/- 200                           |
| K63 | cluster1 | 100          | 1.9 +/- 0.6 | -13 +/- 4                           | -90 +/- 50                           | 0.5 +/- 0.4                         | 600 +/- 100                           |
|     | cluster2 | 43           | 1.5 +/- 0.5 | -9 +/- 4                            | -100 +/- 60                          | 0.3 +/- 0.3                         | 500 +/- 100                           |
|     | cluster3 | 30           | 2.1 +/- 0.7 | -7 +/- 3                            | -80 +/- 40                           | 1 +/- 1                             | 400 +/- 90                            |
|     | cluster4 | 19           | 2 +/- 1     | -8 +/- 3                            | -90 +/- 60                           | 0.4 +/- 0.5                         | 400 +/- 100                           |

**Table S4: Constructs used for protein purification, IVT/T, & expression in cells**

**Constructs for protein purification**

| <b>Ube2S</b>             |             | <b>Vector</b> | <b>Restriction Sites</b> | <b>Tag</b>               |
|--------------------------|-------------|---------------|--------------------------|--------------------------|
| Wild type                | full length | pET28         | NcoI/AscI                | CT 6x His                |
| D29K                     | full length | pET28         | NcoI/AscI                | CT 6x His                |
| G30K                     | full length | pET28         | NcoI/AscI                | CT 6x His                |
| E51A                     | full length | pET28         | NcoI/AscI                | CT 6x His                |
| E51K                     | full length | pET28         | NcoI/AscI                | CT 6x His                |
| D69A                     | full length | pET28         | NcoI/AscI                | CT 6x His                |
| K76A                     | full length | pET28         | NcoI/AscI                | CT 6x His                |
| K76E                     | full length | pET28         | NcoI/AscI                | CT 6x His                |
| Y78A                     | full length | pET28         | NcoI/AscI                | CT 6x His                |
| N87A                     | full length | pET28         | NcoI/AscI                | CT 6x His                |
| N91A                     | full length | pET28         | NcoI/AscI                | CT 6x His                |
| N91E                     | full length | pET28         | NcoI/AscI                | CT 6x His                |
| N91K                     | full length | pET28         | NcoI/AscI                | CT 6x His                |
| E93A                     | full length | pET28         | NcoI/AscI                | CT 6x His                |
| E93K                     | full length | pET28         | NcoI/AscI                | CT 6x His                |
| C95A                     | full length | pET28         | NcoI/AscI                | CT 6x His                |
| C95S                     | full length | pET28         | NcoI/AscI                | CT 6x His                |
| N97A                     | full length | pET28         | NcoI/AscI                | CT 6x His                |
| K100E                    | full length | pET28         | NcoI/AscI                | CT 6x His                |
| R101A                    | full length | pET28         | NcoI/AscI                | CT 6x His                |
| D102A                    | full length | pET28         | NcoI/AscI                | CT 6x His                |
| L114E                    | full length | pET28         | NcoI/AscI                | CT 6x His                |
| C118A                    | full length | pET28         | NcoI/AscI                | CT 6x His                |
| C118S                    | full length | pET28         | NcoI/AscI                | CT 6x His                |
| I121A                    | full length | pET28         | NcoI/AscI                | CT 6x His                |
| H122A                    | full length | pET28         | NcoI/AscI                | CT 6x His                |
| E126A                    | full length | pET28         | NcoI/AscI                | CT 6x His                |
| S127A                    | full length | pET28         | NcoI/AscI                | CT 6x His                |
| S127D                    | full length | pET28         | NcoI/AscI                | CT 6x His                |
| L129A                    | full length | pET28         | NcoI/AscI                | CT 6x His                |
| L129E                    | full length | pET28         | NcoI/AscI                | CT 6x His                |
| E131A                    | full length | pET28         | NcoI/AscI                | CT 6x His                |
| E131K                    | full length | pET28         | NcoI/AscI                | CT 6x His                |
| E132A                    | full length | pET28         | NcoI/AscI                | CT 6x His                |
| R135E                    | full length | pET28         | NcoI/AscI                | CT 6x His                |
| E139A                    | full length | pET28         | NcoI/AscI                | CT 6x His                |
| E139K                    | full length | pET28         | NcoI/AscI                | CT 6x His                |
| Y141A                    | full length | pET28         | NcoI/AscI                | CT 6x His                |
| E142K                    | full length | pET28         | NcoI/AscI                | CT 6x His                |
| R147A                    | full length | pET28         | NcoI/AscI                | CT 6x His                |
| L151A                    | full length | pET28         | NcoI/AscI                | CT 6x His                |
| E51K, E131K              | full length | pET28         | NcoI/AscI                | CT 6x His                |
| C95S, C118A              | full length | pET28         | NcoI/AscI                | CT 6x His                |
| C95A, C118A              | full length | pET28         | NcoI/AscI                | CT 6x His                |
| C95A, C118S              | full length | pET28         | NcoI/AscI                | CT 6x His                |
| E131A, E132A             | full length | pET28         | NcoI/AscI                | CT 6x His                |
| E131K, E132K             | full length | pET28         | NcoI/AscI                | CT 6x His                |
| E131K, E132A             | full length | pET28         | NcoI/AscI                | CT 6x His                |
| D29K, E51K               | full length | pET28         | NcoI/AscI                | CT 6x His                |
| E131A, E132A, D29K       | full length | pET28         | NcoI/AscI                | CT 6x His                |
| E131A, E132A, E51K       | full length | pET28         | NcoI/AscI                | CT 6x His                |
| E131A, E132A, D29K, E51K | full length | pET28         | NcoI/AscI                | CT 6x His                |
| K76A, E93A               | full length | pET28         | NcoI/AscI                | CT 6x His                |
| K76A, E93K               | full length | pET28         | NcoI/AscI                | CT 6x His                |
| K76E, E93A               | full length | pET28         | NcoI/AscI                | CT 6x His                |
| K76E, E93K               | full length | pET28         | NcoI/AscI                | CT 6x His                |
| Wild type                | full length | pMAL          | FseI/AscI                | NT MBP, CT 6x His        |
| E51K                     | full length | pMAL          | FseI/AscI                | NT MBP, CT 6x His        |
| N97A                     | full length | pMAL          | FseI/AscI                | NT MBP, CT 6x His        |
| D102A                    | full length | pMAL          | FseI/AscI                | NT MBP, CT 6x His        |
| C118A                    | full length | pMAL          | FseI/AscI                | NT MBP, CT 6x His        |
| I121A                    | full length | pMAL          | FseI/AscI                | NT MBP, CT 6x His        |
| S127A                    | full length | pMAL          | FseI/AscI                | NT MBP, CT 6x His        |
| E131K, E132K             | full length | pMAL          | FseI/AscI                | NT MBP, CT 6x His        |
| Wild type                | full length | modified*     | -                        | cleavable NT 6x His/Smt3 |
| Wild type                | 1-156       | modified*     | -                        | cleavable NT 6x His/Smt3 |
| K76A                     | 1-156       | modified*     | -                        | cleavable NT 6x His/Smt3 |
| C95S                     | 1-156       | modified*     | -                        | cleavable NT 6x His/Smt3 |
| C118A                    | 1-156       | modified*     | -                        | cleavable NT 6x His/Smt3 |
| C118S                    | 1-156       | modified*     | -                        | cleavable NT 6x His/Smt4 |
| I121A                    | 1-156       | modified*     | -                        | cleavable NT 6x His/Smt3 |
| E131K                    | 1-156       | modified*     | -                        | cleavable NT 6x His/Smt3 |

**Ubiquitin**

|           | <b>Vector</b> | <b>Restriction Sites</b> | <b>Tag</b> |           |
|-----------|---------------|--------------------------|------------|-----------|
| Wild type | full length   | pET28                    | NcoI/AscI  | NT 6x His |
| Q2A       | full length   | pET28                    | NcoI/AscI  | NT 6x His |
| F4A       | full length   | pET28                    | NcoI/AscI  | NT 6x His |
| K6A       | full length   | pET28                    | NcoI/AscI  | NT 6x His |
| K6E       | full length   | pET28                    | NcoI/AscI  | NT 6x His |
| K6R       | full length   | pET28                    | NcoI/AscI  | NT 6x His |

|            |             |       |           |           |
|------------|-------------|-------|-----------|-----------|
| L8A        | full length | pET28 | NcoI/AscI | NT 6x His |
| T9A        | full length | pET28 | NcoI/AscI | NT 6x His |
| T9E        | full length | pET28 | NcoI/AscI | NT 6x His |
| T9K        | full length | pET28 | NcoI/AscI | NT 6x His |
| K11A       | full length | pET28 | NcoI/AscI | NT 6x His |
| K11R       | full length | pET28 | NcoI/AscI | NT 6x His |
| T12A       | full length | pET28 | NcoI/AscI | NT 6x His |
| T12E       | full length | pET28 | NcoI/AscI | NT 6x His |
| T12G       | full length | pET28 | NcoI/AscI | NT 6x His |
| T12I       | full length | pET28 | NcoI/AscI | NT 6x His |
| T14A       | full length | pET28 | NcoI/AscI | NT 6x His |
| T14E       | full length | pET28 | NcoI/AscI | NT 6x His |
| E16K       | full length | pET28 | NcoI/AscI | NT 6x His |
| N25A       | full length | pET28 | NcoI/AscI | NT 6x His |
| D32K       | full length | pET28 | NcoI/AscI | NT 6x His |
| K33A       | full length | pET28 | NcoI/AscI | NT 6x His |
| K33E       | full length | pET28 | NcoI/AscI | NT 6x His |
| E34A       | full length | pET28 | NcoI/AscI | NT 6x His |
| E34D       | full length | pET28 | NcoI/AscI | NT 6x His |
| E34K       | full length | pET28 | NcoI/AscI | NT 6x His |
| E34Q       | full length | pET28 | NcoI/AscI | NT 6x His |
| I44A       | full length | pET28 | NcoI/AscI | NT 6x His |
| A46E       | full length | pET28 | NcoI/AscI | NT 6x His |
| K48E       | full length | pET28 | NcoI/AscI | NT 6x His |
| K63E       | full length | pET28 | NcoI/AscI | NT 6x His |
| E64A       | full length | pET28 | NcoI/AscI | NT 6x His |
| E64K       | full length | pET28 | NcoI/AscI | NT 6x His |
| T66E       | full length | pET28 | NcoI/AscI | NT 6x His |
| H68A       | full length | pET28 | NcoI/AscI | NT 6x His |
| V70A       | full length | pET28 | NcoI/AscI | NT 6x His |
| L71A       | full length | pET28 | NcoI/AscI | NT 6x His |
| R72A       | full length | pET28 | NcoI/AscI | NT 6x His |
| I44A, V70A | full length | pET28 | NcoI/AscI | NT 6x His |
| K11R, E34Q | full length | pET28 | NcoI/AscI | NT 6x His |
| K11R, I44A | full length | pET28 | NcoI/AscI | NT 6x His |
| K11R, V70A | full length | pET28 | NcoI/AscI | NT 6x His |
| K48R, L8A  | full length | pET28 | NcoI/AscI | NT 6x His |
| K48R, V70A | full length | pET28 | NcoI/AscI | NT 6x His |

|           |             |        |              |   |
|-----------|-------------|--------|--------------|---|
| Wild type | full length | pET30a | NdeI/HindIII | - |
| K6A       | full length | pET30a | NdeI/HindIII | - |
| K6E       | full length | pET30a | NdeI/HindIII | - |
| K11A      | full length | pET30a | NdeI/HindIII | - |
| T12A      | full length | pET30a | NdeI/HindIII | - |
| T14E      | full length | pET30a | NdeI/HindIII | - |
| E34A      | full length | pET30a | NdeI/HindIII | - |
| I44A      | full length | pET30a | NdeI/HindIII | - |

|            |         |       |           |           |
|------------|---------|-------|-----------|-----------|
| Wild type  | aa 1-74 | pET28 | NcoI/AscI | NT 6x His |
| K6A        | aa 1-74 | pET28 | NcoI/AscI | NT 6x His |
| K6E        | aa 1-74 | pET28 | NcoI/AscI | NT 6x His |
| L8A        | aa 1-74 | pET28 | NcoI/AscI | NT 6x His |
| K11A       | aa 1-74 | pET28 | NcoI/AscI | NT 6x His |
| T12A       | aa 1-74 | pET28 | NcoI/AscI | NT 6x His |
| T14E       | aa 1-74 | pET28 | NcoI/AscI | NT 6x His |
| E34A       | aa 1-74 | pET28 | NcoI/AscI | NT 6x His |
| K48E       | aa 1-74 | pET28 | NcoI/AscI | NT 6x His |
| T66E       | aa 1-74 | pET28 | NcoI/AscI | NT 6x His |
| H68A       | aa 1-74 | pET28 | NcoI/AscI | NT 6x His |
| L71A       | aa 1-74 | pET28 | NcoI/AscI | NT 6x His |
| R72A       | aa 1-74 | pET28 | NcoI/AscI | NT 6x His |
| I44A, V70A | aa 1-74 | pET28 | NcoI/AscI | NT 6x His |

| Other E2s      |             | Vector | Restriction Sites Tag |           |
|----------------|-------------|--------|-----------------------|-----------|
| E2R1 wild type | full length | pET28  | NcoI/AscI             | CT 6x His |
| E2R1 T122E     | full length | pET28  | NcoI/AscI             | CT 6x His |
| E2R1 L125A     | full length | pET28  | NcoI/AscI             | CT 6x His |
| E2R1 S126A     | full length | pET28  | NcoI/AscI             | CT 6x His |
| E2R1 I128E     | full length | pET28  | NcoI/AscI             | CT 6x His |
| E2R1 S129A     | full length | pET28  | NcoI/AscI             | CT 6x His |

|                  |             |       |           |           |
|------------------|-------------|-------|-----------|-----------|
| Ube2G2 wild type | full length | pET28 | NcoI/AscI | CT 6x His |
| Ube2C            | full length | pET28 | NcoI/AscI | CT 6xHis  |
| Ube2C C114S      | full length | pET28 | NcoI/AscI | CT 6xHis  |

#### Other constructs for protein purification

|         |               |       |           |            |
|---------|---------------|-------|-----------|------------|
| gp78C   | aa 309-643    | pGEX  | FseI/AscI | NT GST     |
| Emi1    | aa 299-447    | pET28 | FseI/AscI | NT 10x His |
| Securin | full length   | pET28 | FseI/AscI | NT His     |
| Cdk2    | full length   | pET28 | FseI/AscI | NT His     |
| HHR23A# | UBA1-2; aa 15 | pGEX  |           | NT GST     |

| Constructs for IVT/T |             | Vector | Restriction Sites Tag |    |
|----------------------|-------------|--------|-----------------------|----|
| Cyclin A2            | full length | pCS2   | FseI/AscI             | -- |
| Ub-L-Cyclin A2       |             | pCS2   | FseI/AscI             | -- |

|              |             |         |           |          |
|--------------|-------------|---------|-----------|----------|
| APC2         | full length | pCS2    | FseI/AscI | NT 3x HA |
| APC3         | full length | pCS2    | FseI/AscI | NT 3x HA |
| APC5         | full length | pCS2    | FseI/AscI | NT 3x HA |
| APC8         | full length | pCS2    | FseI/AscI | NT 3x HA |
| IkappaBalpha | full length | pCMV-HA |           | NT HA    |

### Constructs for expression in cells

#### Ube2S

|           |             |             |                  |    |
|-----------|-------------|-------------|------------------|----|
| Wild type | full length | pcDNA3.1(+) | Hygrc BamHI/NotI | -- |
| E51K      | full length | pcDNA3.1(+) | Hygrc BamHI/NotI | -- |
| D102A     | full length | pcDNA3.1(+) | Hygrc BamHI/NotI | -- |
| I121A     | full length | pcDNA3.1(+) | Hygrc BamHI/NotI | -- |
| S127A     | full length | pcDNA3.1(+) | Hygrc BamHI/NotI | -- |
| L129E     | full length | pcDNA3.1(+) | Hygrc BamHI/NotI | -- |
| E131K     | full length | pcDNA3.1(+) | Hygrc BamHI/NotI | -- |
| R135E     | full length | pcDNA3.1(+) | Hygrc BamHI/NotI | -- |

#### SCF Subunits

|          |             |        |           |         |
|----------|-------------|--------|-----------|---------|
| Cul1     | full length | pcDNA3 |           | --      |
| Skp1     | full length | pCDNA3 |           | NT myc  |
| betaTrCP | full length | pcDNA3 |           | NT FLAG |
| Rbx1     | full length | pCS2   | FseI/AscI | NT His  |

\*Winger JA, Derbyshire ER, Lamers MH, Marletta MA, and Kuriyan J. (2008). The crystal structure of the catalytic domain of a eukaryotic guanylate cyclase. *BMC Struct Biol.* 8, 42.

#Raasi S, Orlov I, Fleming KG, Pickart CM. (2004). Binding of polyubiquitin chains to ubiquitin-associated (UBA) domains of HHR23A. *J Mol Biol.* 341, 1367-79.
