# Supplementary material
Source: PubMed Central journal article supplement (PMC3072108)

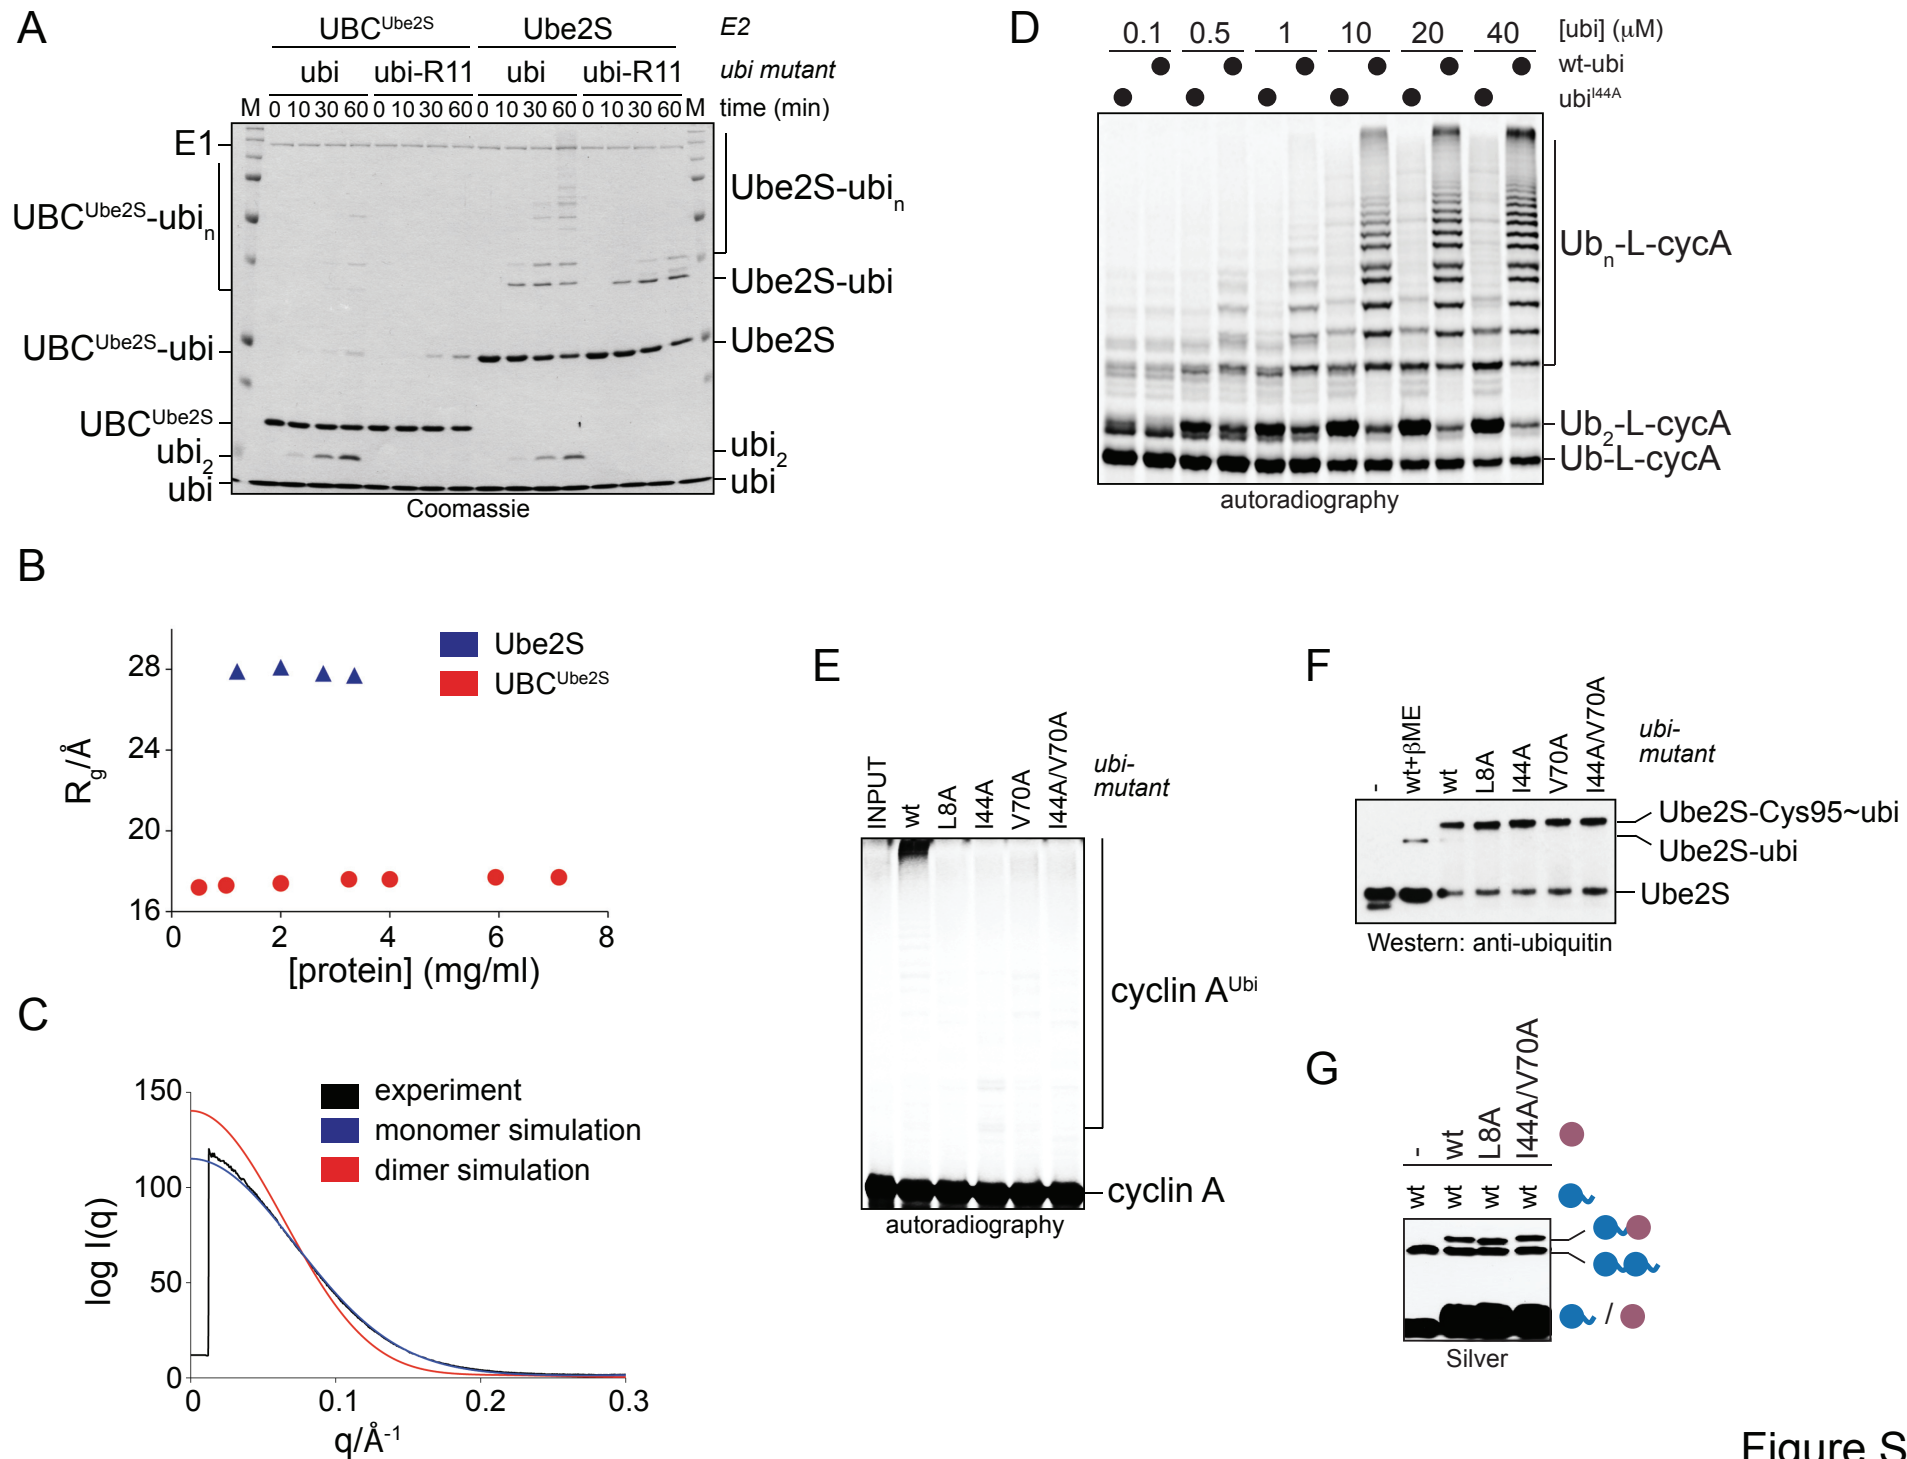

Figure S1

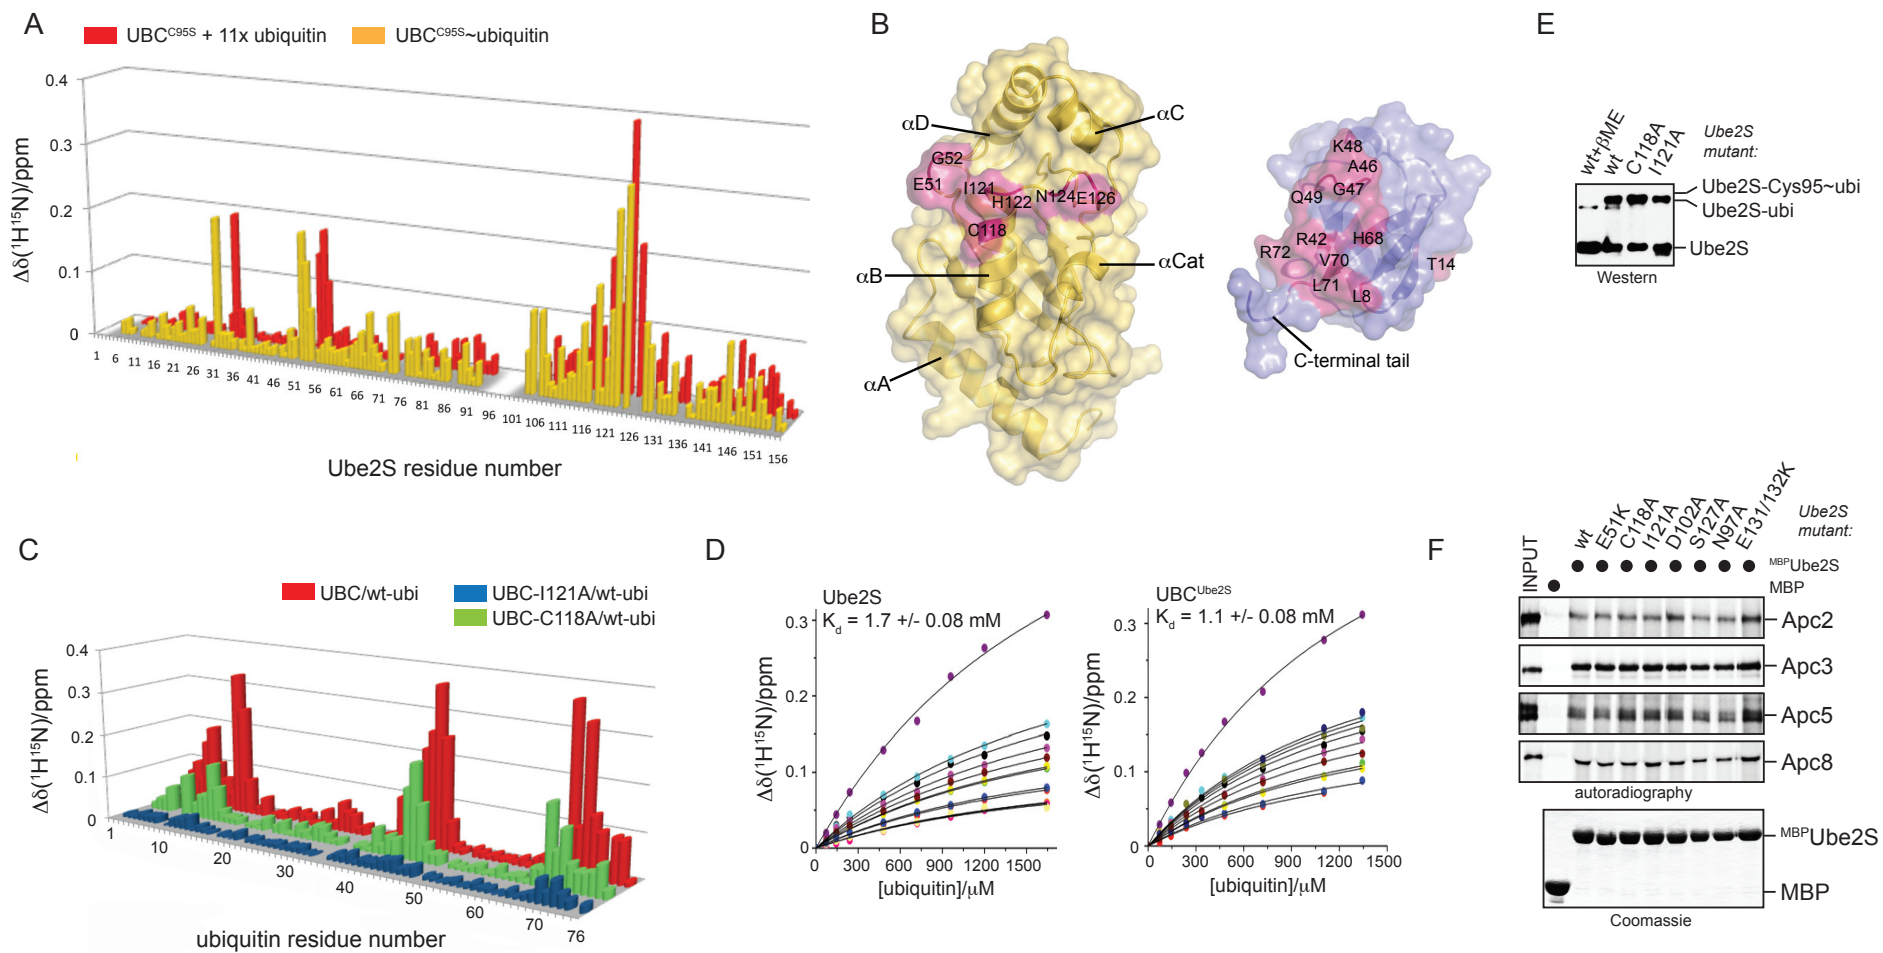

Figure S2

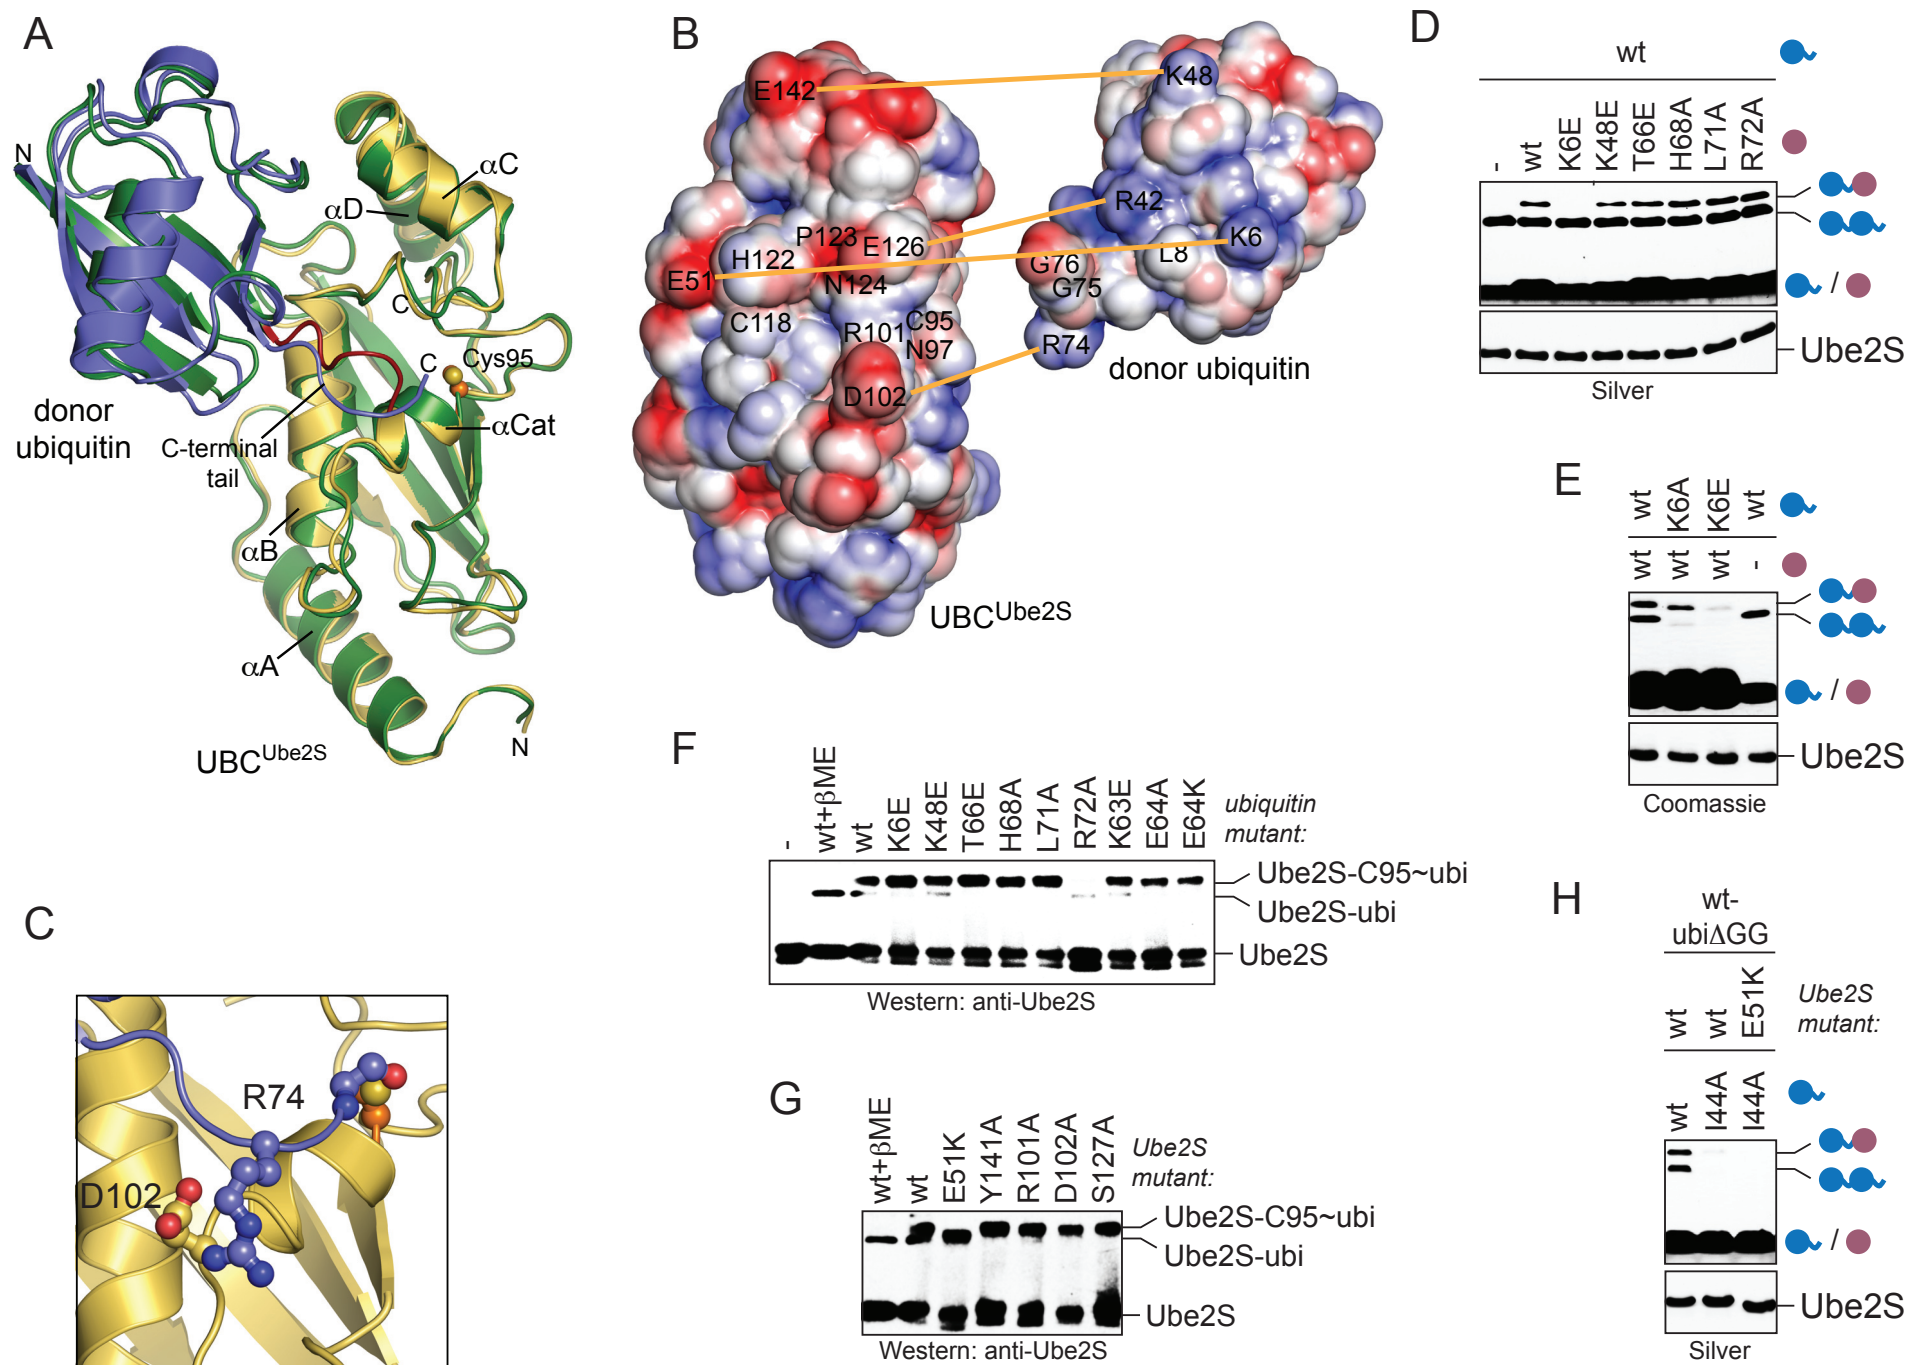

Figure S3

A

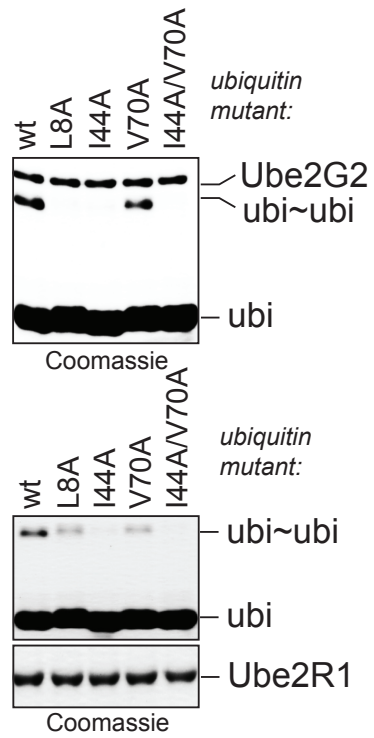

B

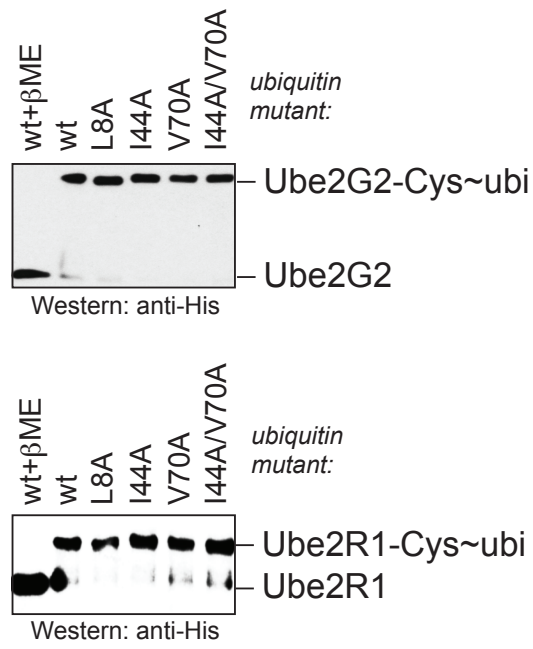

C

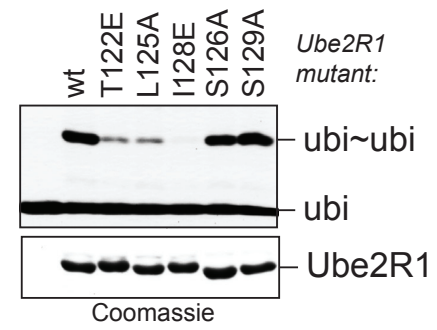

D

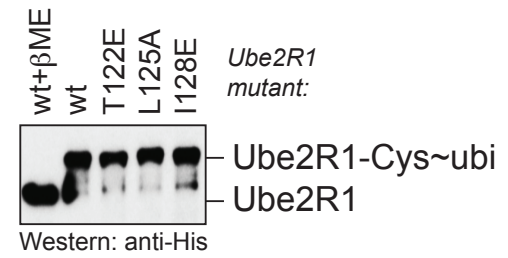

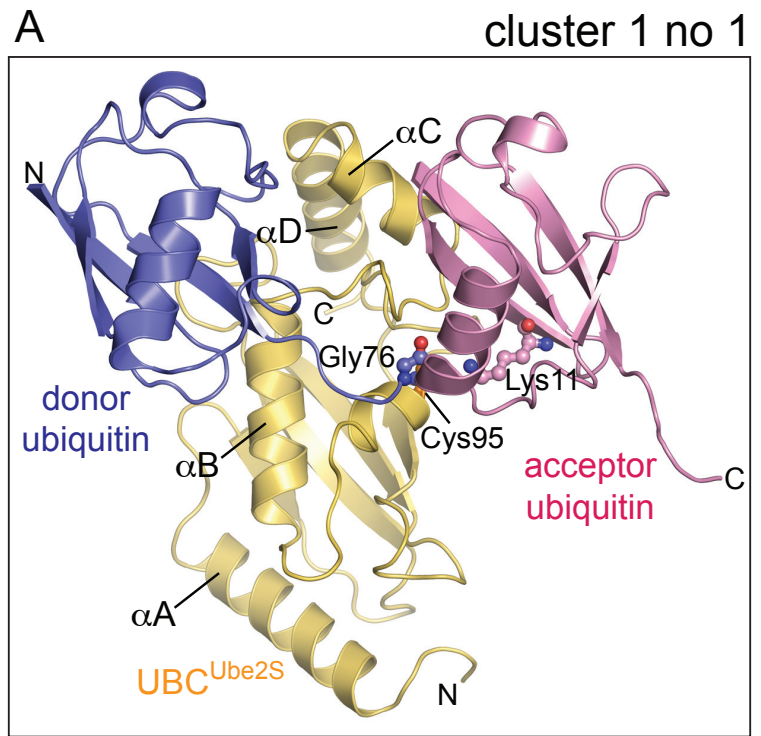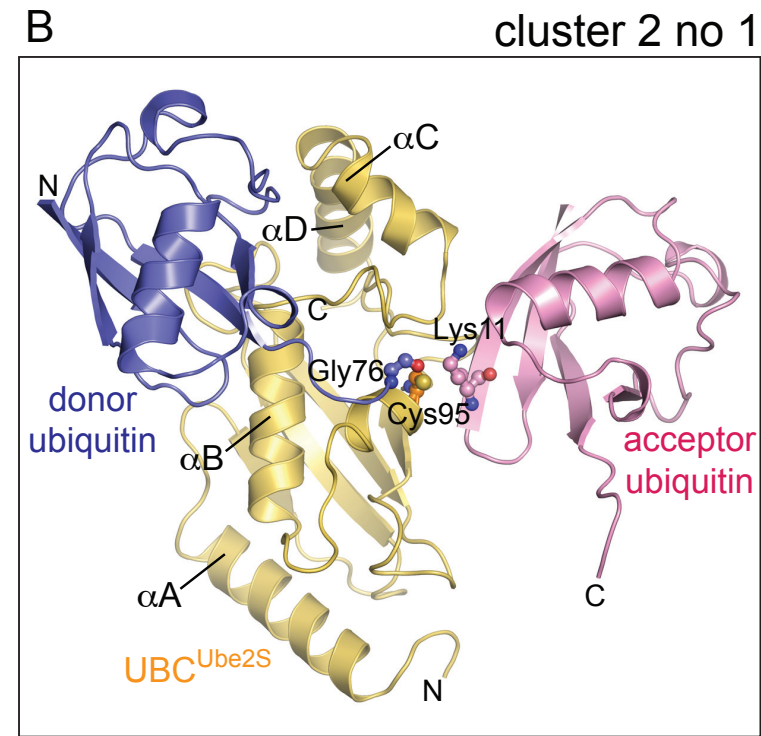

Figure S5

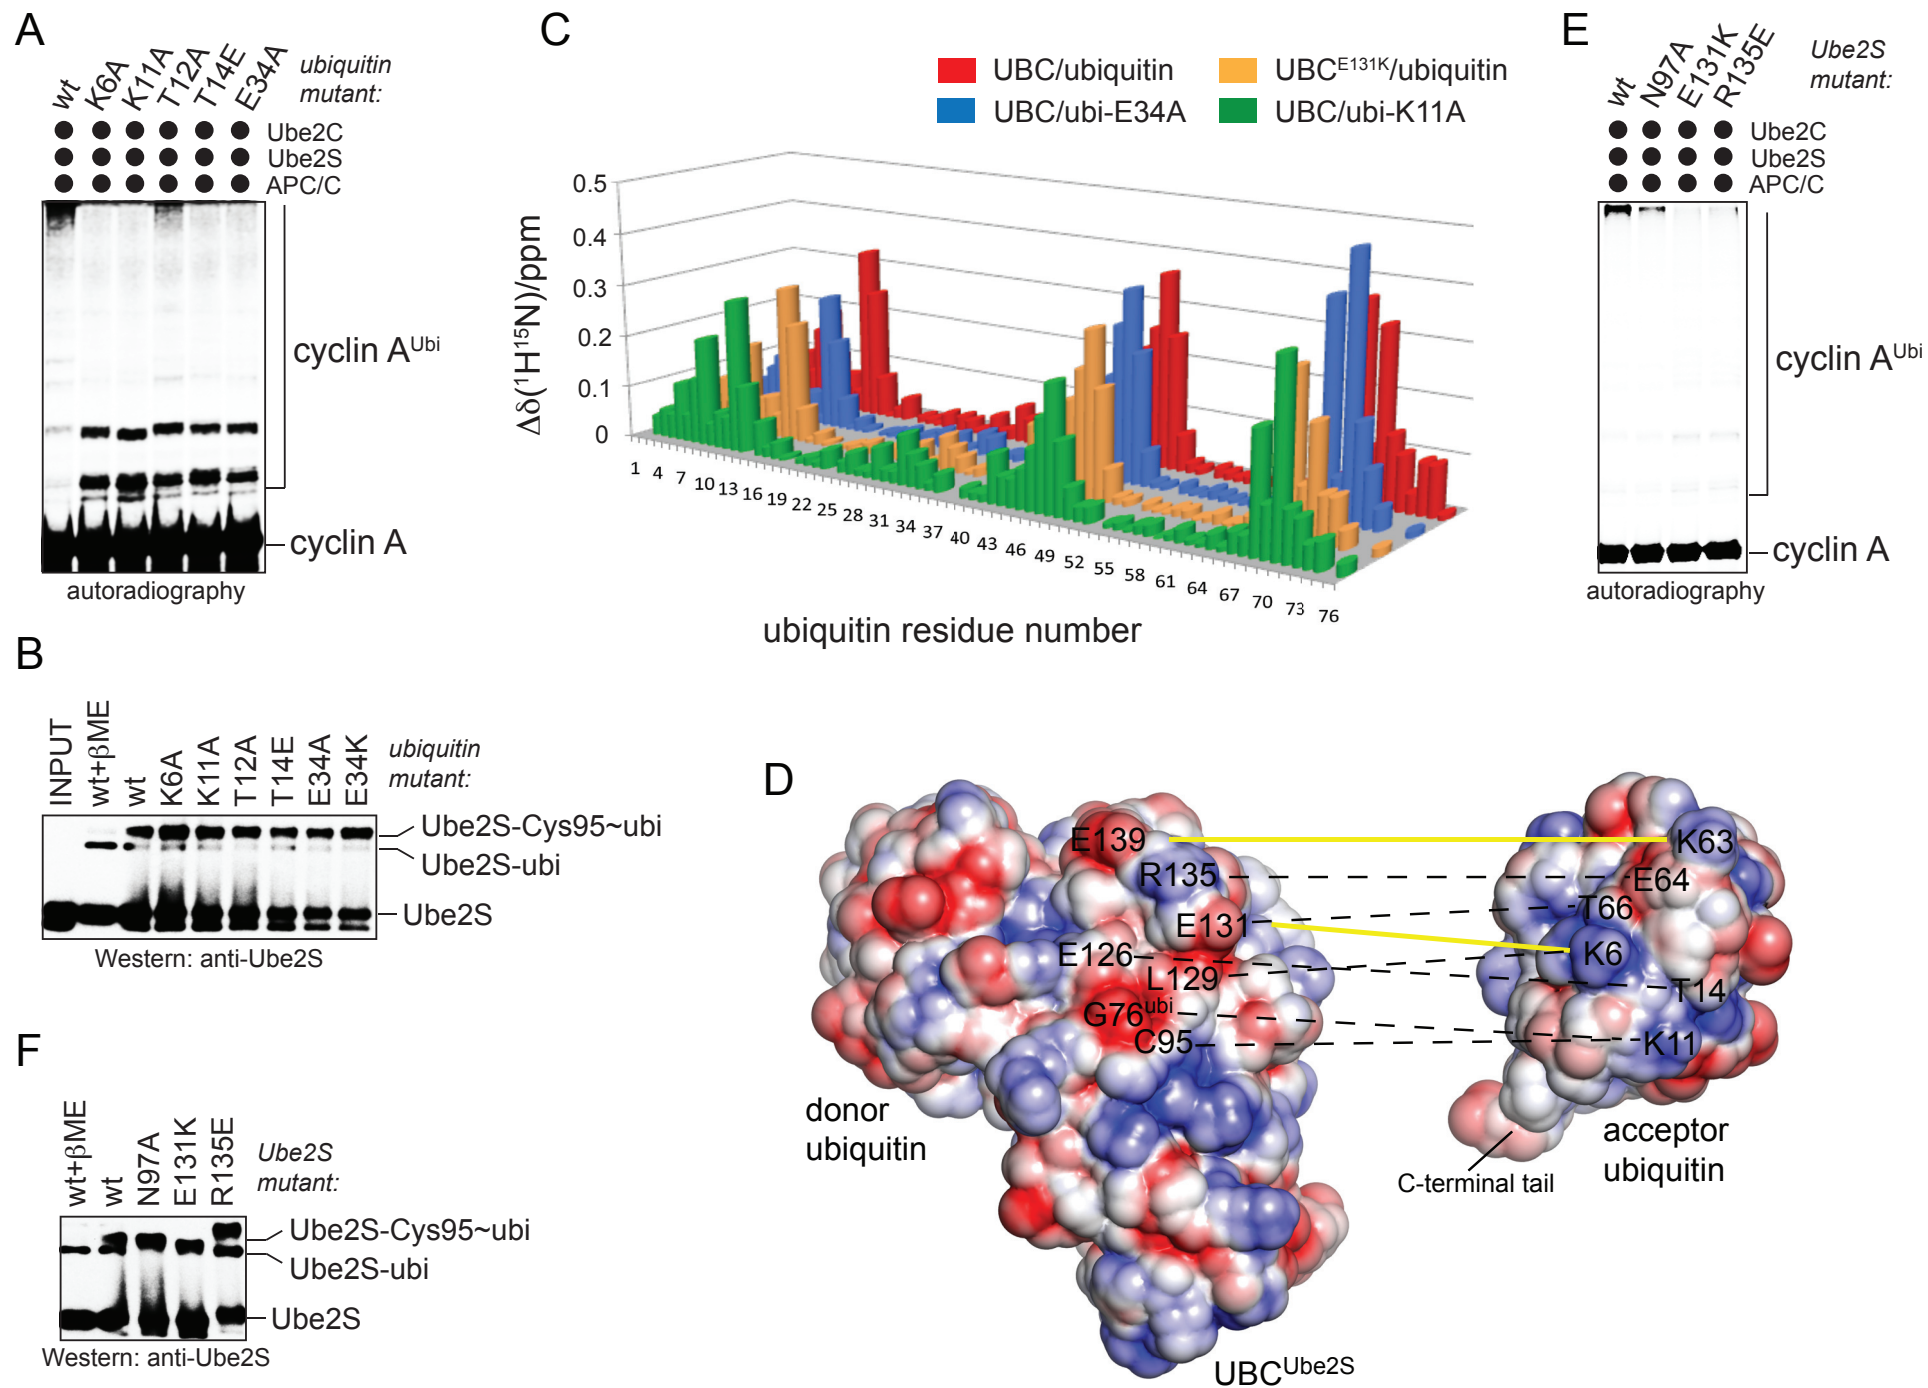

Figure S6

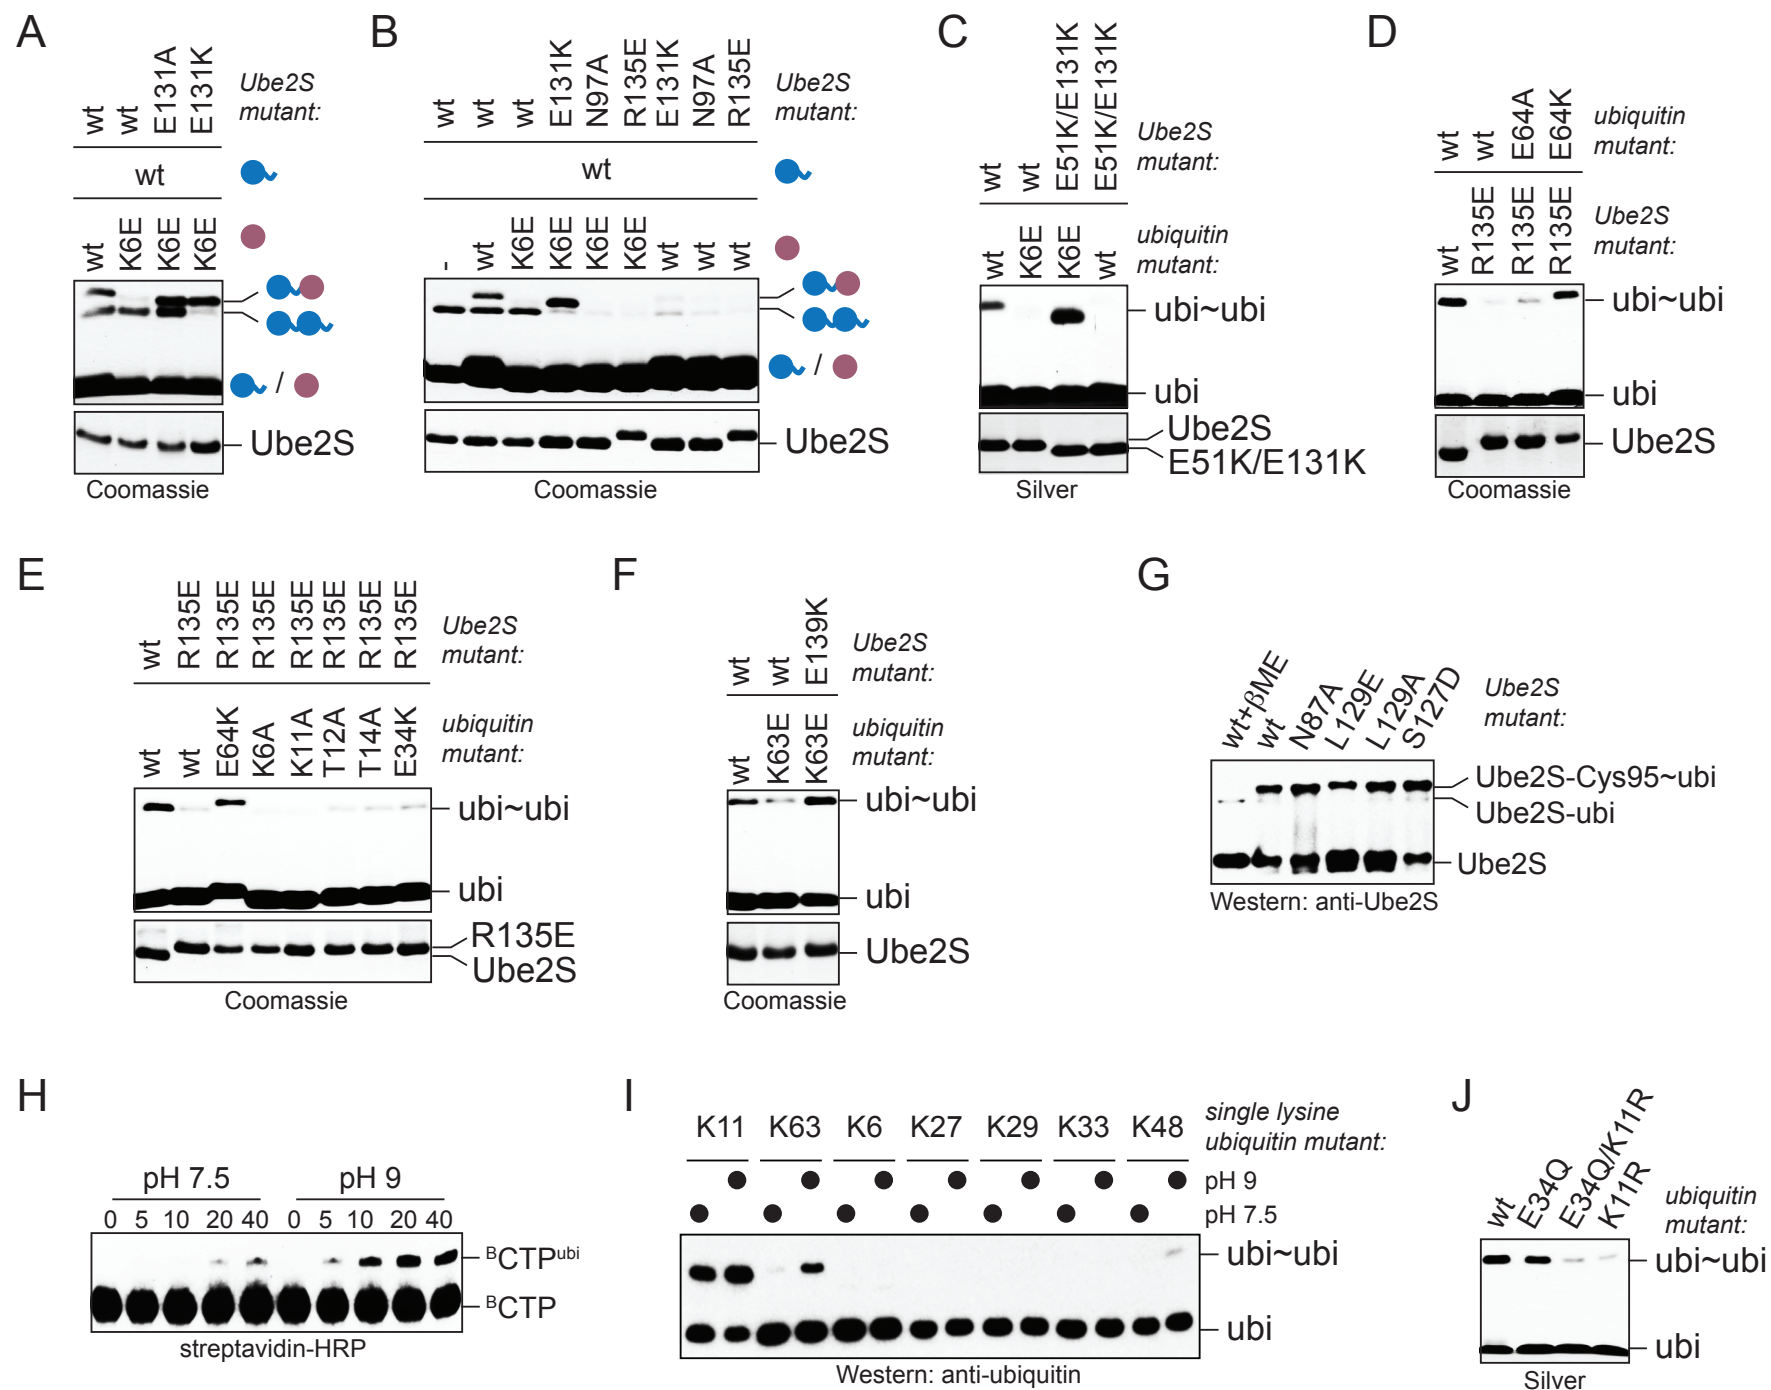

Figure S7

K11

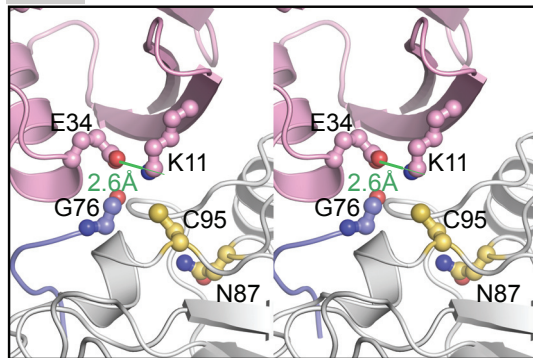

K6

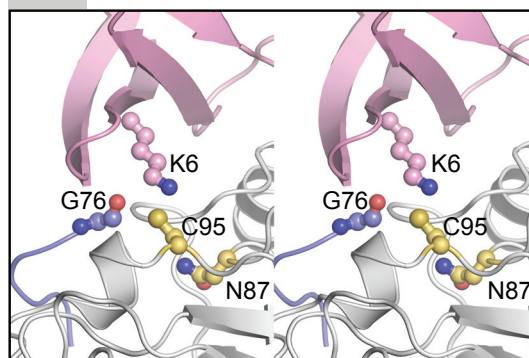

K33

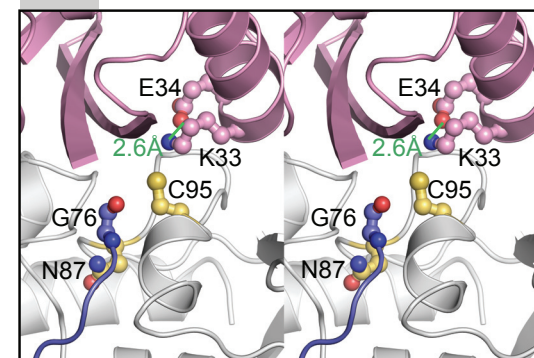

K27

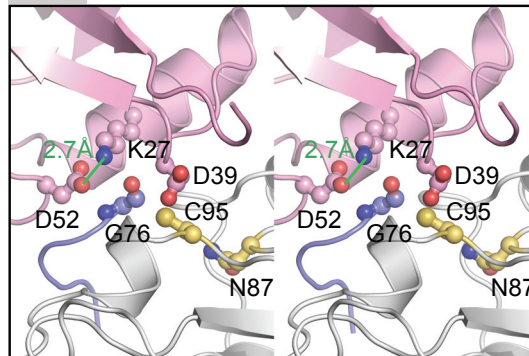

K48

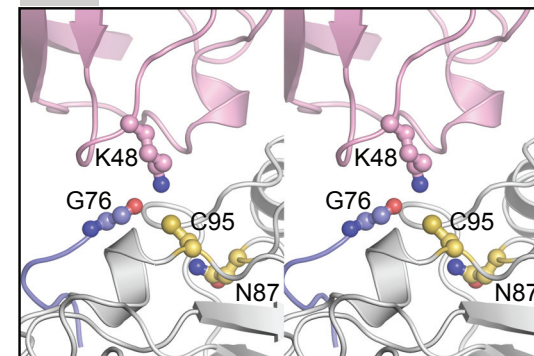

K29

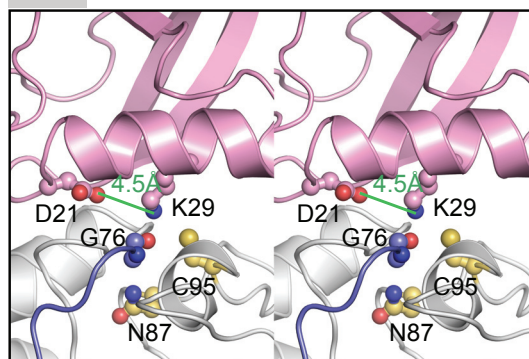

K63

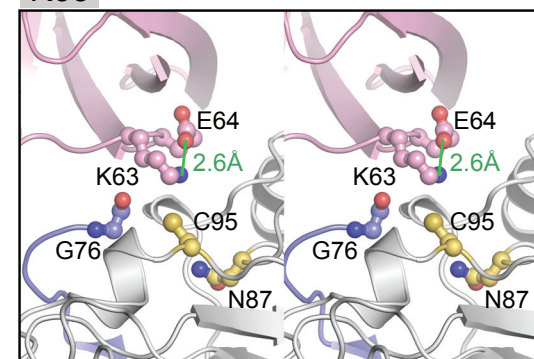

Figure S8

Supplement: NIHMS282273-supplement-02.pdf [file NIHMS282273-supplement-02.pdf]
